# Supplementary material for: Synergetic antibacterial nanosheet based on Ti3C2Tx photothermal therapy and cationic polymer to eradicate drug-resistant bacterial biofilms
Source: Royal Society of Chemistry journal article supplement (doi:10.1039/d4nr03888f), 2024-01-01
Supplement: d4nr03888f1.pdf [file d4nr03888f1.pdf]

# Supporting Information

## **Synergetic antibacterial nanosheet based on $Ti_3C_2T_x$ photothermal therapy and cationic polymer to eradicate drug-resistant bacterial biofilms**

Chuming Pang<sup>a</sup>, Yingxin Tan<sup>a</sup>, Jiahao Ling<sup>a</sup>, Liangzhi Hong<sup>a,b\*</sup>

<sup>a</sup> School of Materials Science and Engineering, South China University of Technology, Guangzhou 510640, China.

<sup>b</sup> Guangdong Provincial Key Laboratory of Luminescence from Molecular Aggregates, South China University of Technology, Guangzhou 510640, China.

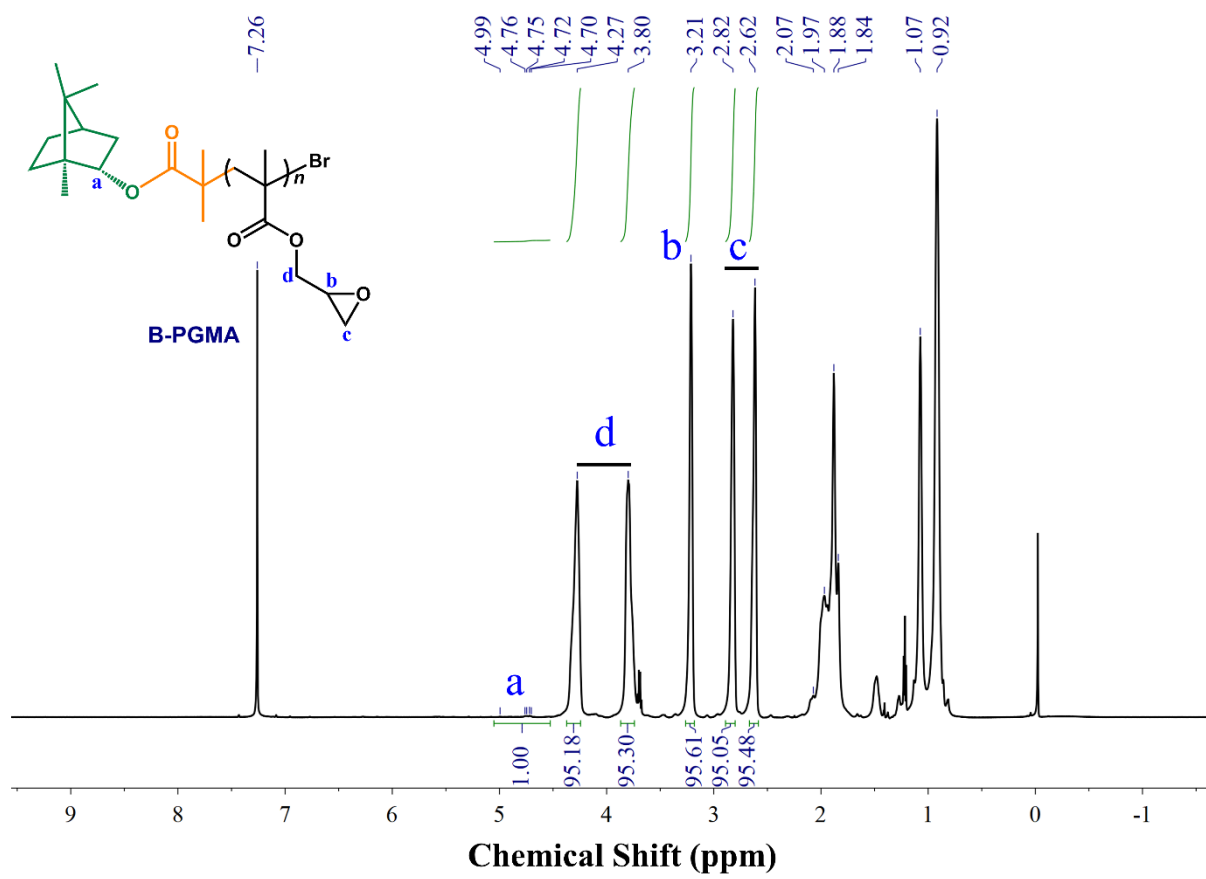

**Figure S1** The  $^1\text{H}$  NMR spectrum (600 MHz,  $\text{CDCl}_3$ ) of  $\alpha$ -(+)-borneol-poly(glycidyl methacrylate) (B-PGMA).

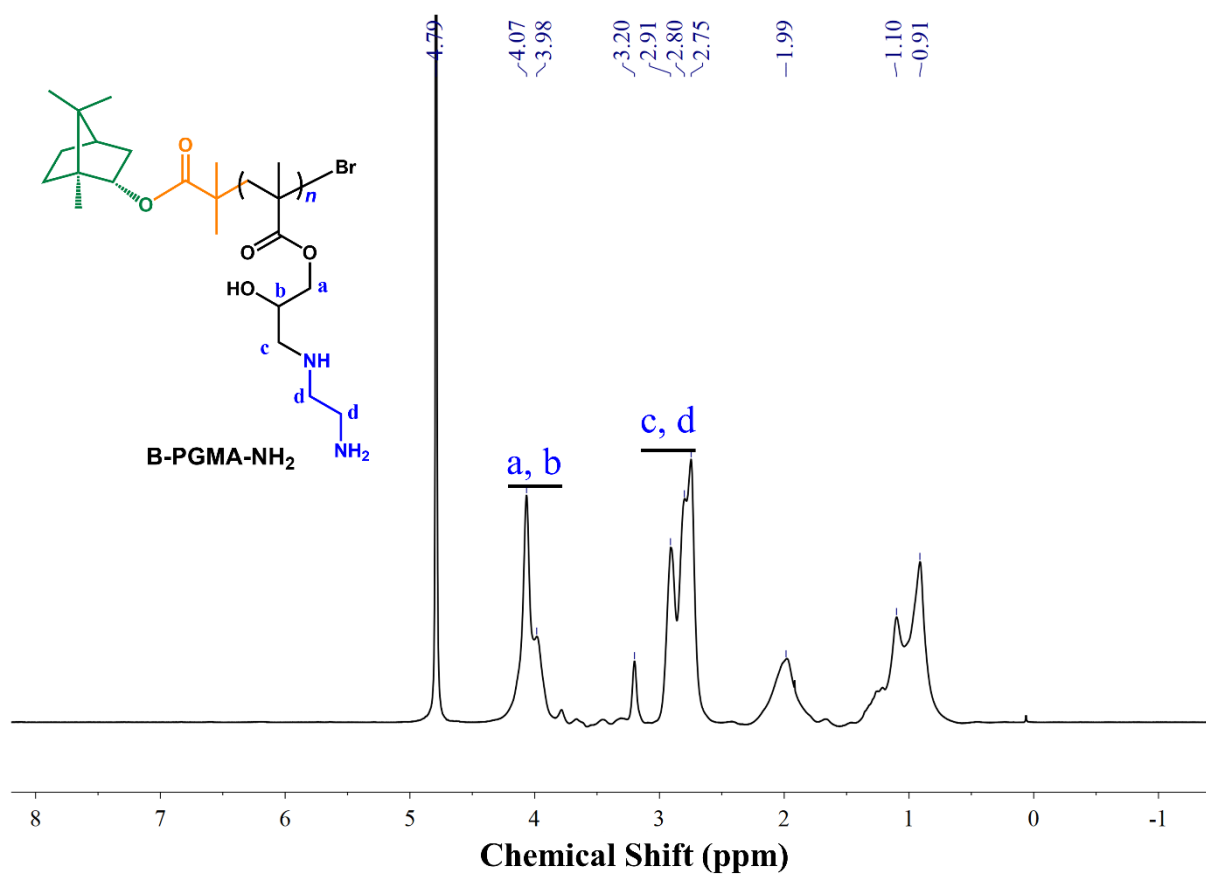

**Figure S2** The <sup>1</sup>H NMR spectrum (600 MHz, D<sub>2</sub>O) of ring-open product primary amine modified α-(+)-borneol-poly(glycidyl methacrylate) (B-PGMA-NH<sub>2</sub>).

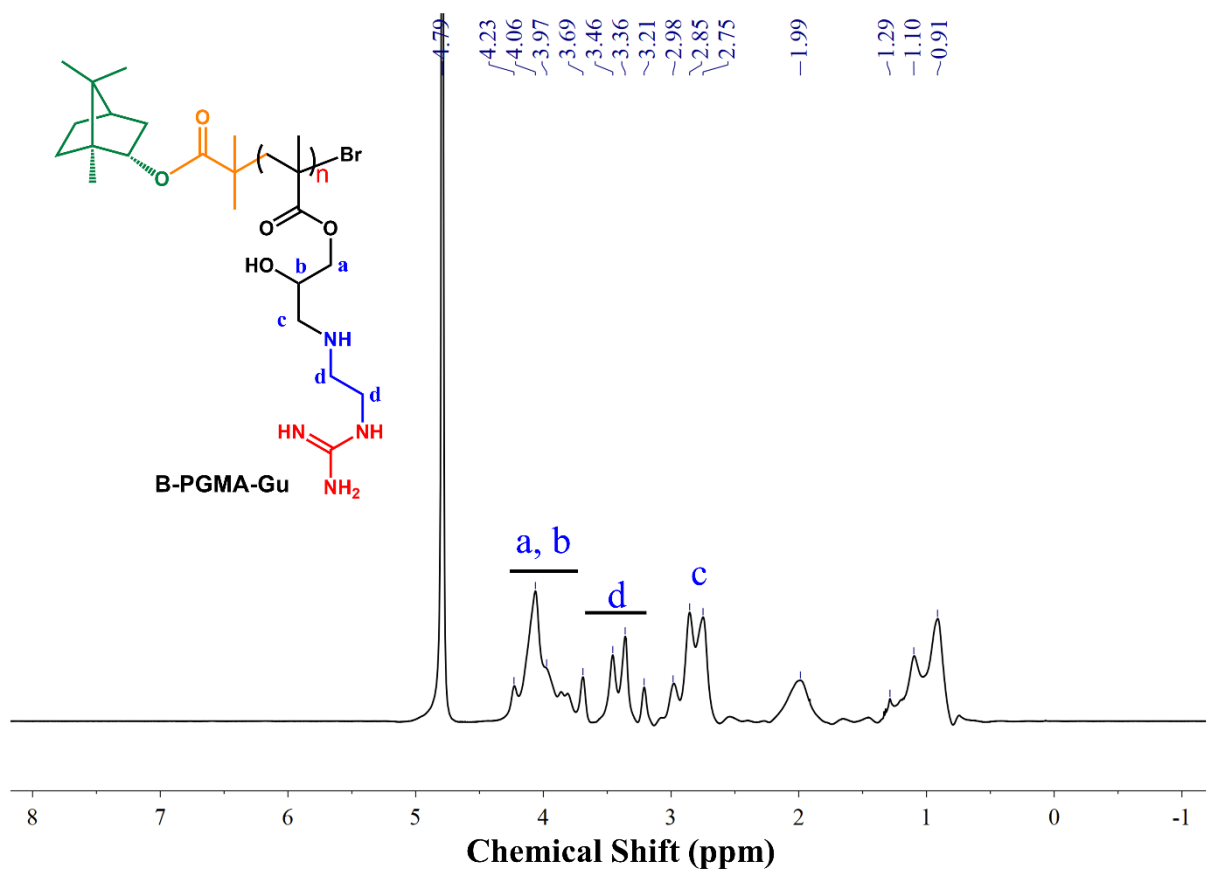

**Figure S3** The <sup>1</sup>H NMR spectrum (600 MHz, D<sub>2</sub>O) of guanidine modified  $\alpha$ -(+)-borneol-poly(glycidyl methacrylate) (B-PGMA-Gu).

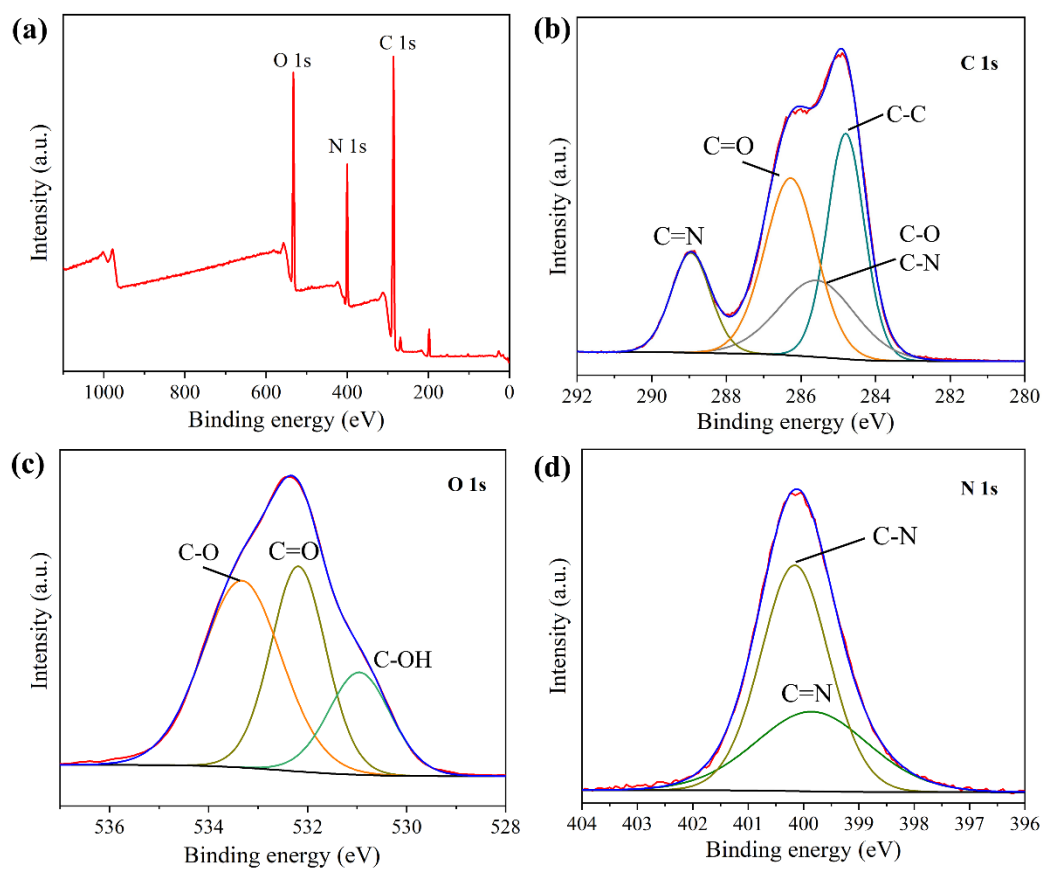

**Figure S4** (a-d) The XPS spectra of guanidine-based polymer B-PGMA-Gu and its high-resolution fine spectra.

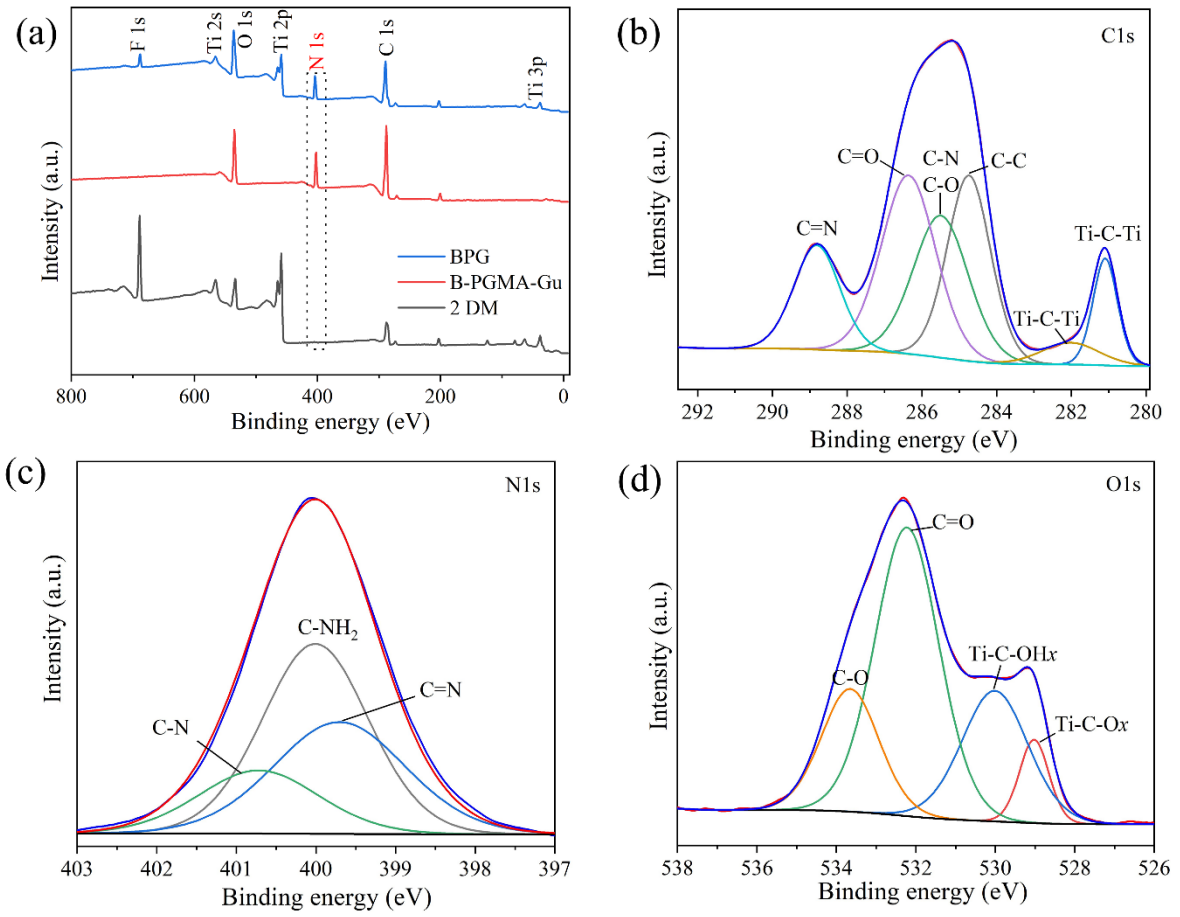

**Figure S5** (a-d) The XPS spectra of 2D nanosheet BPG and its high-resolution fine spectra.

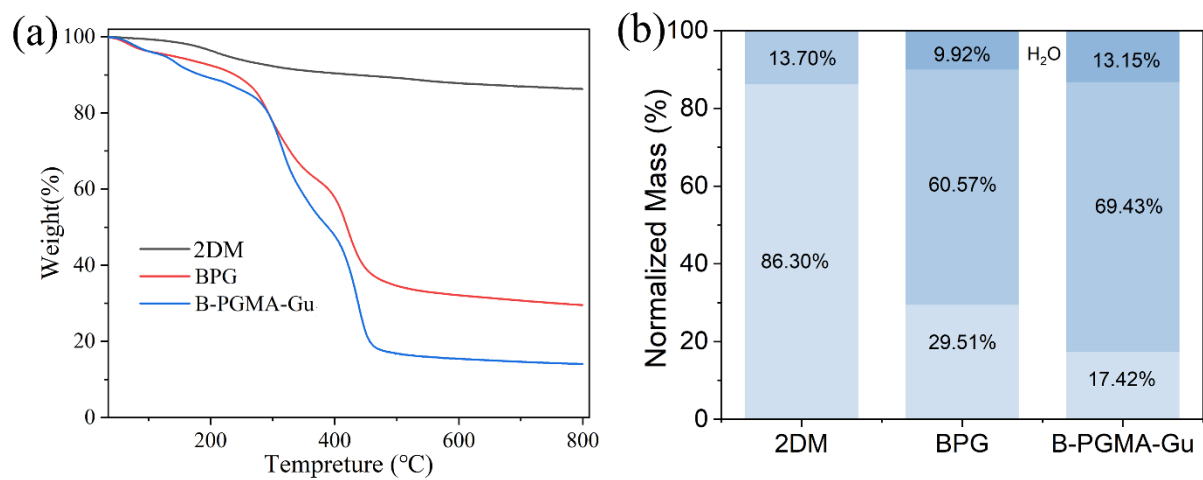

**Figure S6** (a) The thermogravimetric analysis (TGA) of BPG, B-PGMA-Gu and 2DM and (b) their normalized weight loss distribution. (Temperature rate:  $10\text{ }^{\circ}\text{C}\cdot\text{min}^{-1}$ , protective gas:  $\text{N}_2$ ).

Storage at 4 °C 14 days

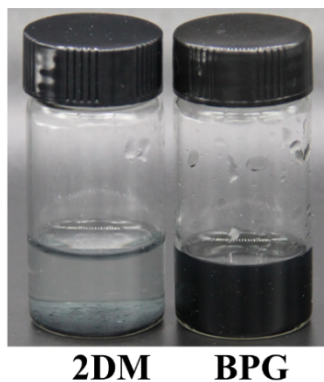

**Figure S7** The photo of 2DM and BPG aqueous solution storage at 4 °C for 14 days.



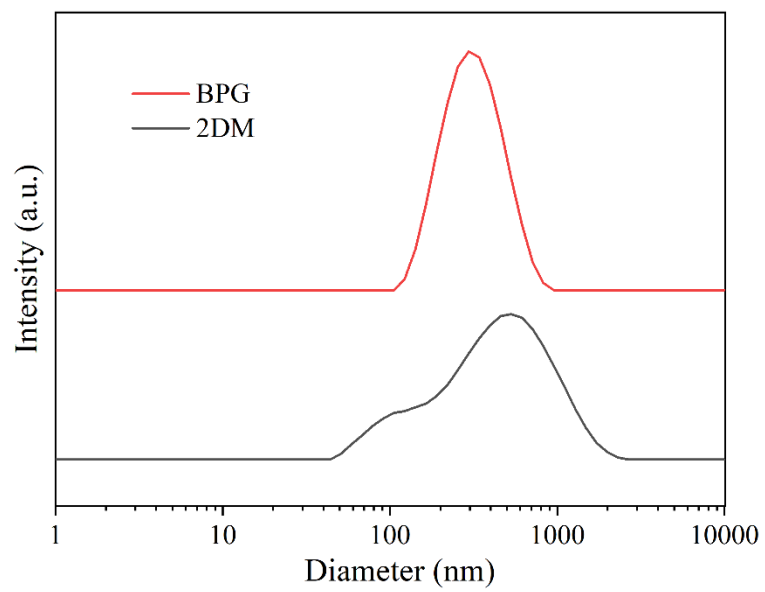

**Figure S8** The particle-size distribution of BPG and 2DM in H<sub>2</sub>O detected by DLS analysis.

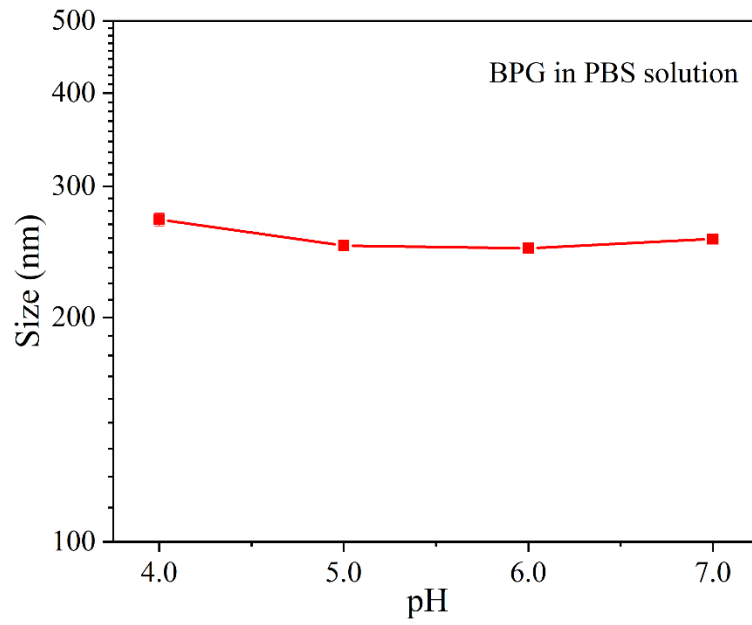

**Figure S9** The corresponding diameter changes of BPG in PBS at different pH values.

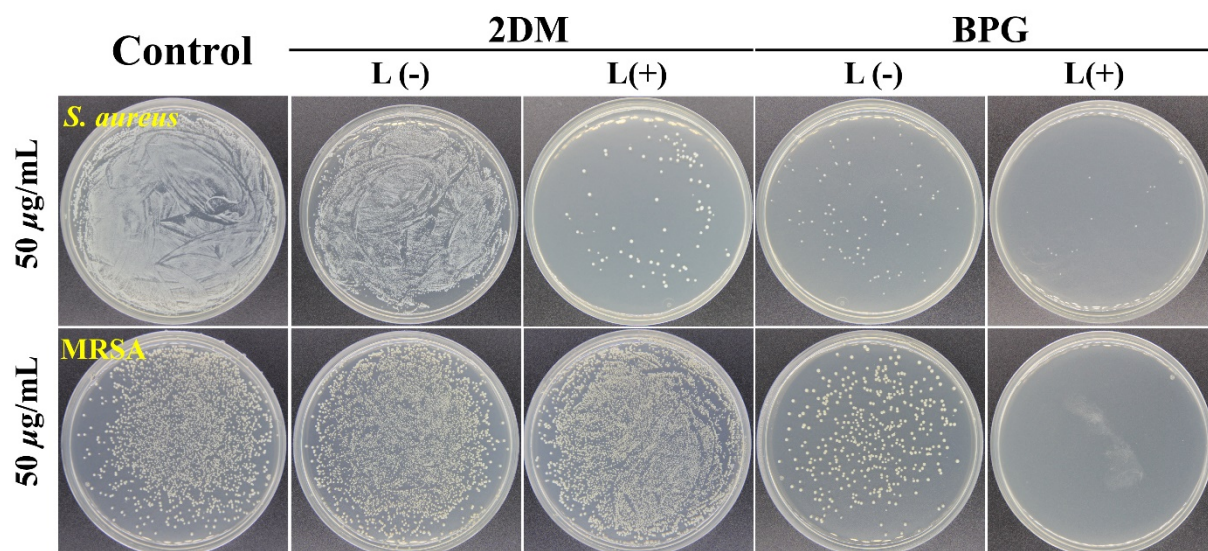

**Figure S10** The vitro photothermal antibacterial activity ( $0.7 \text{ W cm}^{-2}$ , 5 min) of composite BPG and 2DM ( $50 \mu\text{g mL}^{-1}$ ) against *S. aureus* and *MRSA*.

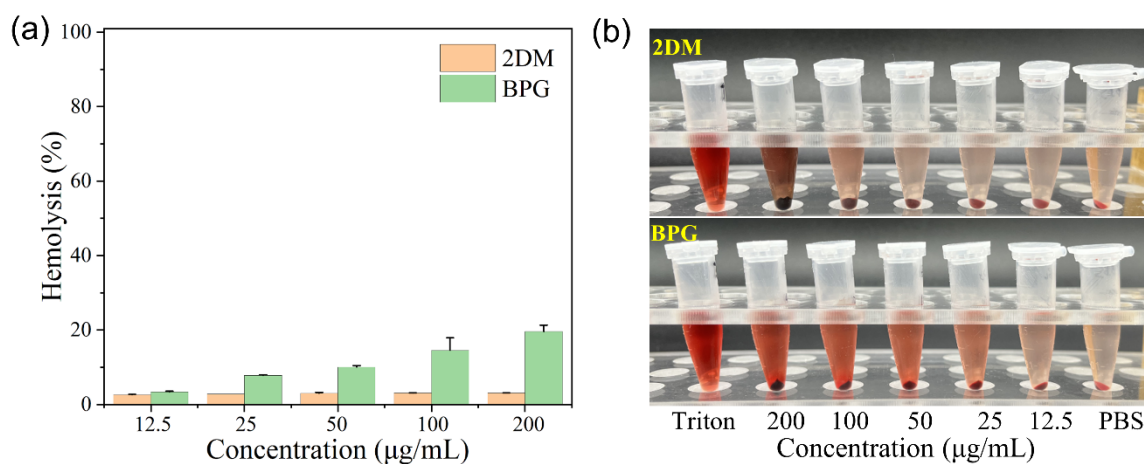

**Figure S11** (a) The hemolysis of  $Ti_3C_2T_x$  2DM and BPG at different concentrations and (b) the corresponding photographs of hemolysis.

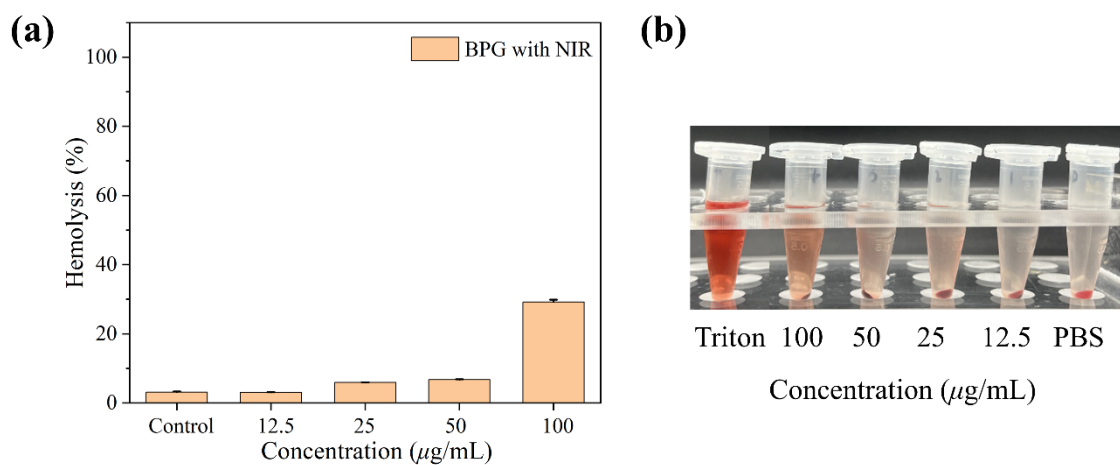

**Figure S12** (a) The hemolysis of BPG at different concentrations under 808 nm radiation and (b) the corresponding photographs of hemolysis.

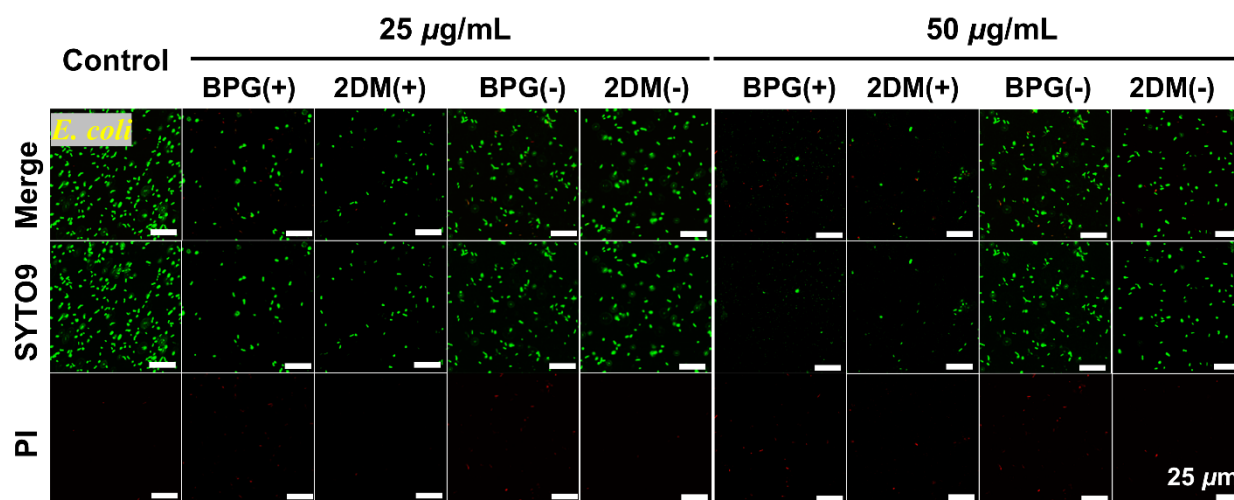

**Figure S13** The integrity of cell membrane after the *E. coli* combined with composite BPG or 2DM ( $c = 25, 50 \mu\text{g mL}^{-1}$ , (+): with NIR radiation; (-): without NIR radiation).

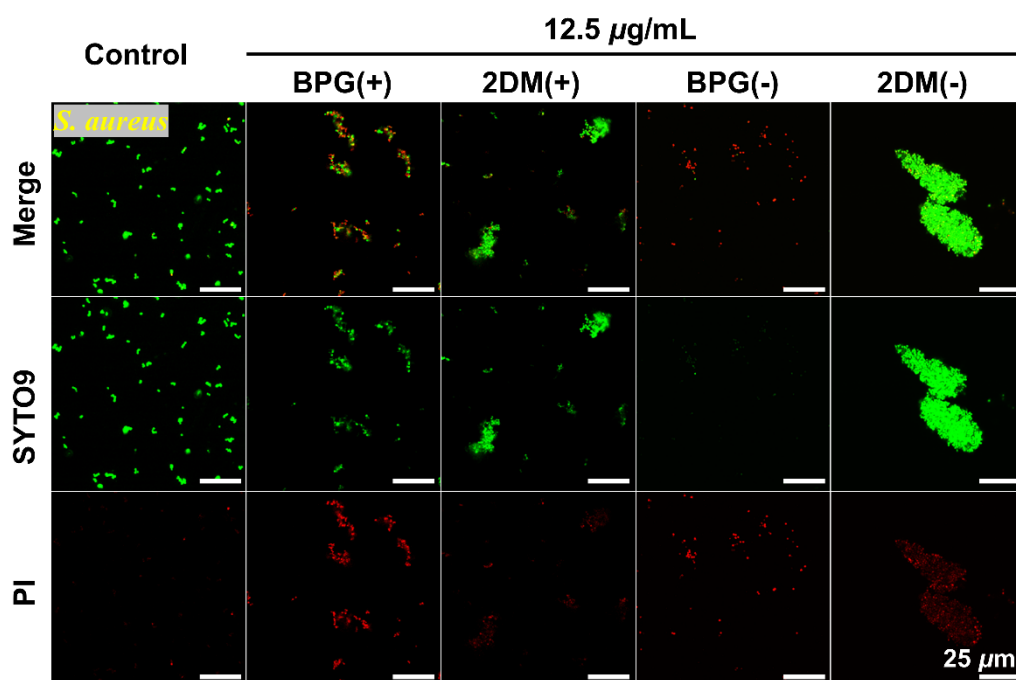

**Figure S14** The integrity of cell membrane after the *S. aureus* combined with composite BPG or 2DM ( $c = 12.5 \mu\text{g mL}^{-1}$ , (+): with NIR radiation; (-): without NIR radiation).

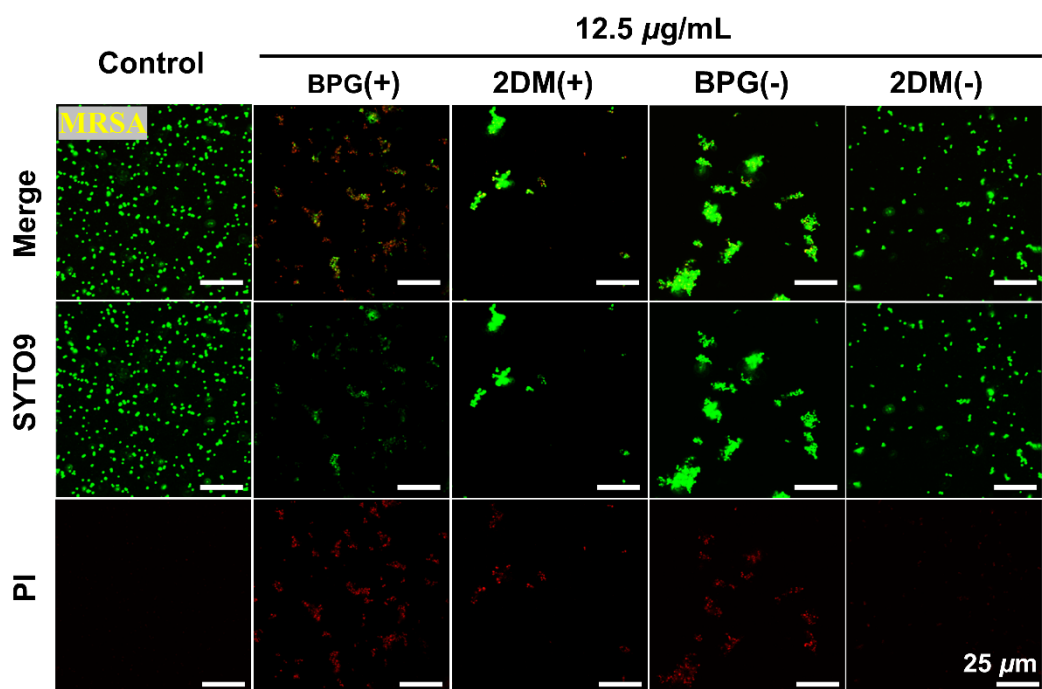

**Figure S15** The integrity of cell membrane after the MRSA combined with composite BPG or 2DM ( $c = 12.5 \mu\text{g mL}^{-1}$ , (+): with NIR radiation; (-): without NIR radiation).

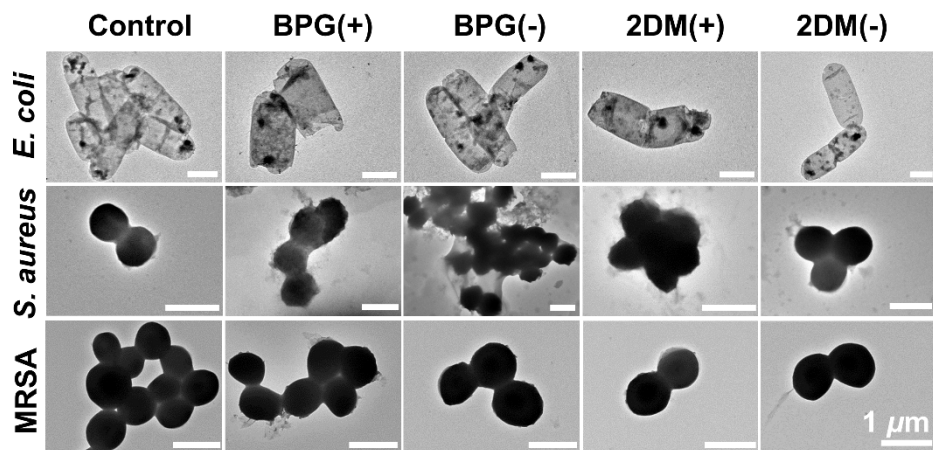

**Figure S16** The morphology changes of membrane after treatment with composite BPG or 2DM by TEM analysis.



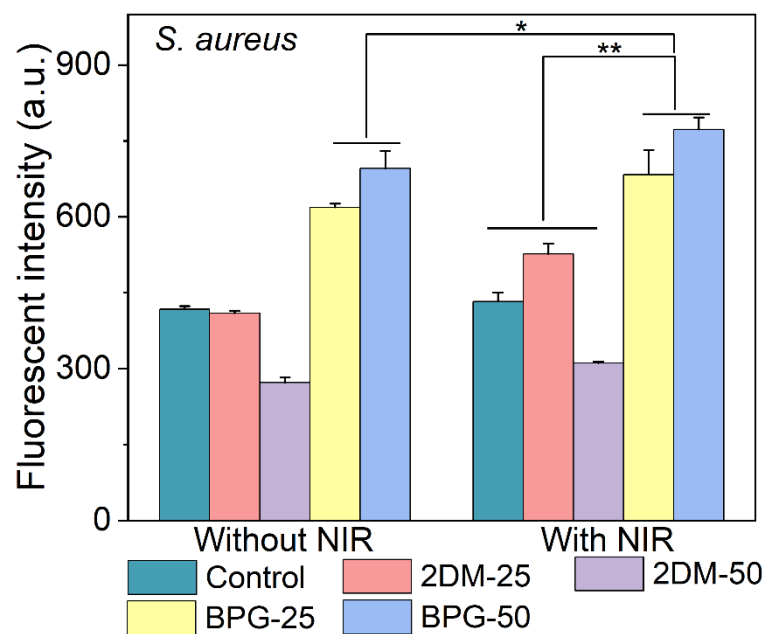

**Figure S17** The detection of ROS in the intracellular oxidative stress reaction occurs after *S. aureus* incubated with BPG or 2DM (with/without NIR radiation).

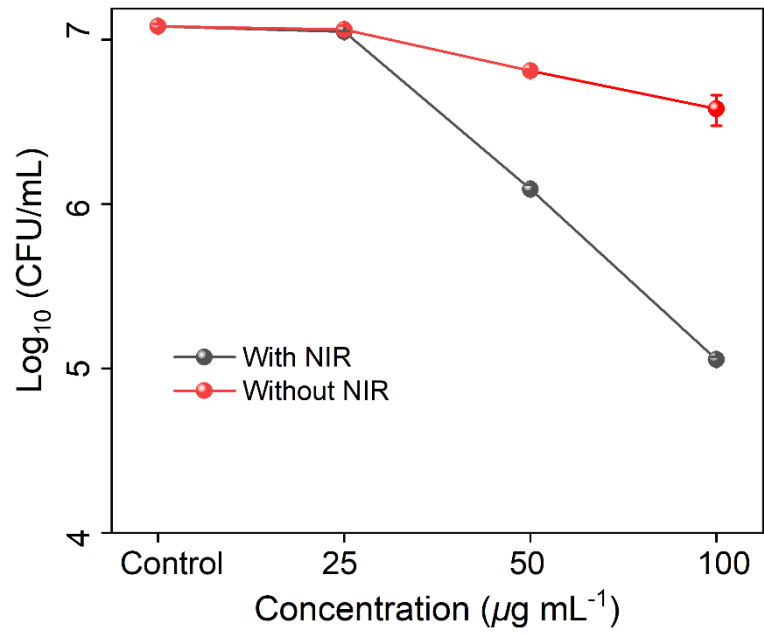

**Figure S18** The reduction of bacterial colonies after the mature biofilms treated with different concentrations (25, 50, 100 µg mL<sup>-1</sup>) of BPG with/without 808 nm NIR radiation.
